# Supplementary material
Source: Springer Nature journal article supplement (https://www.springermedizin.de/resource/supplementary/12967_2012_1514_MOESM9_ESM.pdf/9574202)

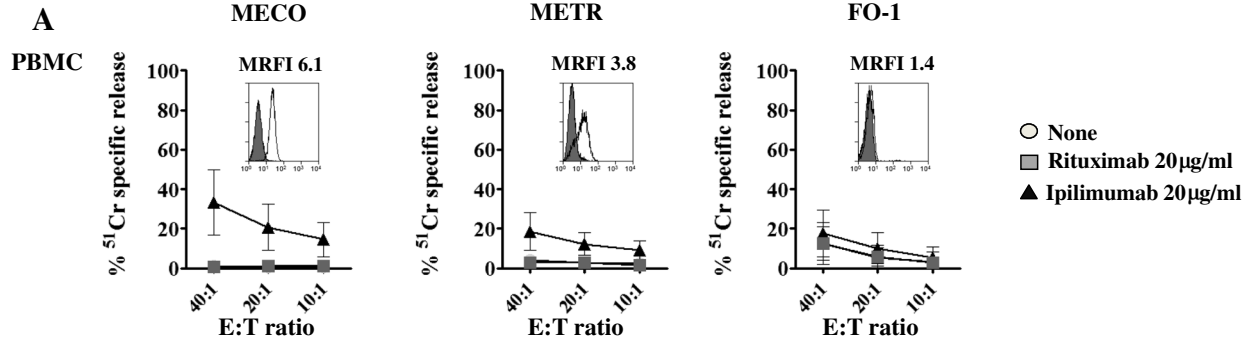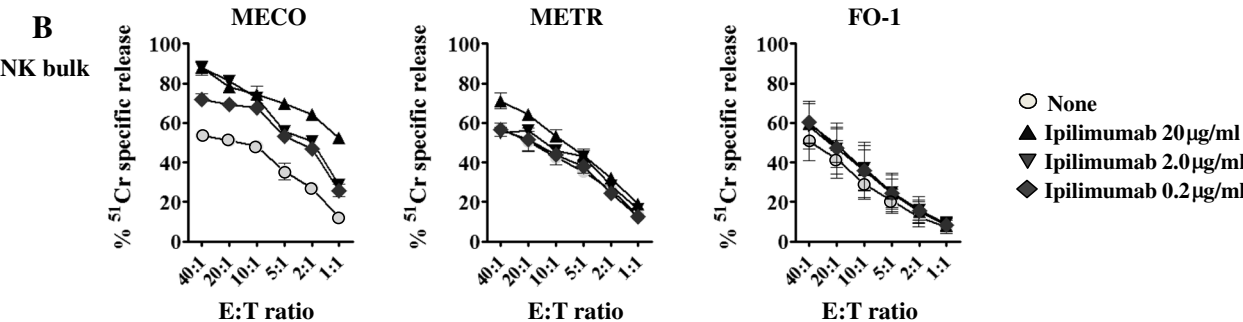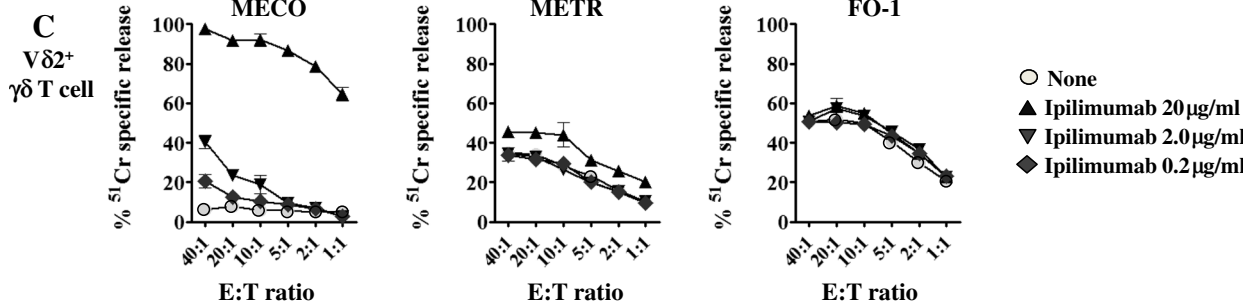

Supplement: MOESM9 [file 9574202]
